# Supplementary material
Source: publisher figshare collection journal article supplement (https://asha.figshare.com/articles/dataset/_/14614941)
Supplement: Supplementary file 1 [file 1]

**Supplemental Material S4.** Correlation table between demographic information, language information extracted from each discourse task, and iconic gestures (collapsed across subtypes; for frequency and rate) in  $N = 43$  subjects (subjects who gestured on both tasks).

|                                          | I    | II   | III  | IV   | V    | VI   | VII  | VIII | IX   | XI   | XII  | XIII | XIV  | XV   | XVI  | XVII |
|------------------------------------------|------|------|------|------|------|------|------|------|------|------|------|------|------|------|------|------|
| I. Age at testing (yrs)                  | 1.00 |      |      |      |      |      |      |      |      |      |      |      |      |      |      |      |
| II. Aphasia severity (WAB AQ)            | -.24 | 1.00 |      |      |      |      |      |      |      |      |      |      |      |      |      |      |
| III. Speech-language therapy (yrs)       | .29  | -.27 | 1.00 |      |      |      |      |      |      |      |      |      |      |      |      |      |
| IV. Aphasia duration (yrs)               | .28  | -.14 | .59  | 1.00 |      |      |      |      |      |      |      |      |      |      |      |      |
| V. Education (yrs)                       | -.01 | -.20 | .39  | .05  | 1.00 |      |      |      |      |      |      |      |      |      |      |      |
| VI. Window: Speaking time (secs)         | -.14 | .21  | .10  | -.11 | .10  | 1.00 |      |      |      |      |      |      |      |      |      |      |
| VII. Window: Total Utterances            | -.10 | .02  | .15  | .02  | .21  | .54  | 1.00 |      |      |      |      |      |      |      |      |      |
| VIII. Window: Words per Minute           | .09  | .37  | -.23 | -.17 | .07  | -.45 | .04  | 1.00 |      |      |      |      |      |      |      |      |
| IX. Window: Hesitation proportion        | -.16 | -.25 | .26  | .12  | .05  | -.06 | -.20 | -.25 | 1.00 |      |      |      |      |      |      |      |
| X. Window: Iconic gesture frequency      | .02  | -.17 | .34  | .52  | .11  | .29  | .32  | -.24 | .01  | 1.00 |      |      |      |      |      |      |
| XI. Window: Iconic gestures per word     | -.13 | -.42 | .36  | .57  | -.04 | -.01 | -.04 | -.54 | .32  | .75  | 1.00 |      |      |      |      |      |
| XII. Sandwich: Speaking time (secs)      | .03  | .20  | .16  | .14  | .03  | .33  | .02  | -.15 | .00  | .06  | .03  | 1.00 |      |      |      |      |
| XIII. Sandwich: Total Utterances         | .22  | -.01 | .14  | .26  | .05  | -.12 | -.03 | .23  | -.13 | .09  | .03  | .69  | 1.00 |      |      |      |
| XIV. Sandwich: Words per Minute          | .10  | .24  | -.32 | -.27 | .01  | -.31 | .09  | .79  | -.26 | -.18 | -.46 | -.32 | .11  | 1.00 |      |      |
| XV. Sandwich: Hesitation proportion      | .09  | -.24 | .46  | .38  | .13  | .31  | .05  | -.68 | .22  | .37  | .52  | .27  | -.02 | -.80 | 1.00 |      |
| XVI. Sandwich: Iconic gesture frequency  | .06  | .28  | .13  | .14  | .03  | .18  | .11  | .20  | -.12 | .25  | .01  | .65  | .63  | .07  | .06  | 1.00 |
| XVII. Sandwich: Iconic gestures per word | -.12 | -.23 | .15  | .19  | -.26 | .09  | .02  | -.50 | .30  | .40  | .60  | -.16 | -.26 | -.36 | .37  | .13  |
