# Supplementary material
Source: publisher figshare collection journal article supplement (https://asha.figshare.com/articles/dataset/_/14614941)
Supplement: Supplementary file 2 [file 1]

**Supplemental Material S1.** Iconic gesture examples from the gesture coding, for the Window task, and for the Sandwich task, demonstrating a variety of gesture forms used.

| <b>Gesture form</b>                                        | <b>Reference</b>                        |
|------------------------------------------------------------|-----------------------------------------|
| <i>Window Task</i>                                         |                                         |
| Hands cupped, palms facing one another                     | Ball                                    |
| Draws circle on table/in air                               | Ball                                    |
| Uses two fingers to perform 'kicking' action               | Kicking ball through window             |
| Arcs hand/arm through the air from one side                | Trajectory of ball                      |
| <i>Sandwich Task</i>                                       |                                         |
| Hand flat/palm up                                          | Slices of bread                         |
| Hand cupped, palm up                                       | Jar                                     |
| Flat hands come together                                   | Putting together sandwich/folding bread |
| One open hand with outside edge down, moves back and forth | Slicing/cutting sandwich                |
