# Supplementary material
Source: publisher figshare collection journal article supplement (https://asha.figshare.com/articles/dataset/_/14614941)
Supplement: Supplementary file 3 [file 1]

**Supplemental Material S2.** Descriptive statistics of gesture type frequency for all gesture types (i.e., iconic, emblem, concrete deictic, and number) collected as a part of this study in  $N = 75$  participants.

| Task<br>Gesture type        | Window                  |                           | Sandwich                |                          |
|-----------------------------|-------------------------|---------------------------|-------------------------|--------------------------|
|                             | Frequency               | Rate                      | Frequency               | Rate                     |
| Iconic                      | 1.84 (2.59, range 0–11) | .03 (.06, range 0–.27)    | 7.11 (4.39, range 1–34) | .16 (.09, range .03–.41) |
| Viewpoint                   | 1.16 (1.76, range 0–7)  | .02 (.04, range 0–.18)    | 4.10 (2.74, range 0–19) | .10 (.08, range 0–.34)   |
| Referential +<br>metaphoric | .68 (1.19, range 0–6)   | .01 (.02, range 0–.12)    | 3.01 (2.53, range 0–15) | .06 (.05, range 0–.20)   |
| Emblem                      | 0.63 (1.21, range 0–7)  | .02 (.04, range 0–.23)    | 0.85 (1.29, range 0–7)  | .02 (.03, range 0–.16)   |
| Number                      | 0.01 (0.12, range 0–1)  | .0004 (.004, range 0–.03) | 0.48 (0.99, range 0–6)  | .02 (.05, range 0–.38)   |
| Concrete deictic*           | 4.52 (2.23, range 0–12) | .11 (.13, range 0–.78)    | none                    | none                     |

\*All concrete deictic gestures observed in this study referred to the image provided during the Window task; as Sandwich did not provide an image, this is likely why no concrete deictic gestures were observed.
