# Supplementary material
Source: publisher figshare collection journal article supplement (https://asha.figshare.com/articles/dataset/_/14614941)
Supplement: Supplementary file 4 [file 1]

**Supplemental Material S3.** Correlation table between demographic information, language information extracted from each discourse task, and iconic gestures (collapsed across subtypes; for frequency and rate) in  $N = 75$  subjects.

|                                          | I    | II   | III  | IV   | V    | VI   | VII  | VIII | IX   | XI   | XII  | XIII | XIV  | XV   | XVI  | XVII |
|------------------------------------------|------|------|------|------|------|------|------|------|------|------|------|------|------|------|------|------|
| I. Age at testing (yrs)                  | 1.00 |      |      |      |      |      |      |      |      |      |      |      |      |      |      |      |
| II. Aphasia severity (WAB AQ)            | -.21 | 1.00 |      |      |      |      |      |      |      |      |      |      |      |      |      |      |
| III. Speech-language therapy (yrs)       | .08  | -.19 | 1.00 |      |      |      |      |      |      |      |      |      |      |      |      |      |
| IV. Aphasia duration (yrs)               | .04  | -.10 | .66  | 1.00 |      |      |      |      |      |      |      |      |      |      |      |      |
| V. Education (yrs)                       | .00  | .04  | .30  | .16  | 1.00 |      |      |      |      |      |      |      |      |      |      |      |
| VI. Window: Speaking time (secs)         | -.13 | .16  | .09  | .06  | .05  | 1.00 |      |      |      |      |      |      |      |      |      |      |
| VII. Window: Total Utterances            | -.07 | .05  | .10  | .10  | .22  | .68  | 1.00 |      |      |      |      |      |      |      |      |      |
| VIII. Window: Words per Minute           | .10  | .38  | -.28 | -.22 | .18  | -.43 | .03  | 1.00 |      |      |      |      |      |      |      |      |
| IX. Window: Hesitation proportion        | .01  | -.14 | .20  | .08  | -.11 | -.24 | -.39 | -.22 | 1.00 |      |      |      |      |      |      |      |
| X. Window: Iconic gesture frequency      | -.23 | -.07 | .21  | .37  | .08  | .34  | .45  | -.09 | -.13 | 1.00 |      |      |      |      |      |      |
| XI. Window: Iconic gestures per word     | -.28 | -.15 | .22  | .40  | .03  | .24  | .34  | -.19 | -.03 | .95  | 1.00 |      |      |      |      |      |
| XII. Sandwich: Speaking time (secs)      | -.11 | .13  | .16  | .19  | .03  | .46  | .30  | -.25 | -.16 | .12  | .11  | 1.00 |      |      |      |      |
| XIII. Sandwich: Total Utterances         | -.11 | .08  | .11  | .30  | .13  | .15  | .28  | .13  | -.22 | .31  | .29  | .69  | 1.00 |      |      |      |
| XIV. Sandwich: Words per Minute          | .07  | .31  | -.34 | -.23 | .19  | -.26 | .09  | .78  | -.21 | .05  | -.04 | -.35 | .18  | 1.00 |      |      |
| XV. Sandwich: Hesitation proportion      | .03  | -.18 | .50  | .47  | .05  | .27  | .02  | -.58 | .26  | .18  | .24  | .24  | .02  | -.67 | 1.00 |      |
| XVI. Sandwich: Iconic gesture frequency  | -.20 | .23  | .13  | .21  | .15  | .19  | .27  | .13  | -.20 | .25  | .17  | .62  | .69  | .10  | -.08 | 1.00 |
| XVII. Sandwich: Iconic gestures per word | -.23 | -.13 | .31  | .25  | -.14 | .04  | -.10 | -.50 | .22  | .07  | .14  | -.06 | -.21 | -.47 | .34  | .18  |
